# Supplementary material for: Extreme weather anomalies and surface signatures associated with merged Atlantic-African jets during winter
Source: Copernicus journal article supplement (doi:10.5194/egusphere-2024-2745), 2024-09-19
Supplement: Supplementary file 2 [file egusphere-2024-2745-supplement.pdf]

# 1 Supplementary details

| Winter month groups |                     |                     |                     |                     |
|---------------------|---------------------|---------------------|---------------------|---------------------|
| Group-A (14 months) | Group-B (29 months) | Group-C (20 months) | Group-D (32 months) | Group-E (25 months) |
| month=1 year=1963   | month=1 year=1960   | month=1 year=1960   | month=12 year=1963  | month=1 year=1964   |
| month=12 year=1963  | month=2 year=1960   | month=2 year=1960   | month=1 year=1964   | month=12 year=1965  |
| month=2 year=1965   | month=12 year=1961  | month=12 year=1961  | month=12 year=1965  | month=1 year=1966   |
| month=2 year=1969   | month=12 year=1962  | month=12 year=1962  | month=1 year=1966   | month=2 year=1966   |
| month=1 year=1970   | month=1 year=1963   | month=2 year=1964   | month=2 year=1966   | month=1 year=1969   |
| month=12 year=1973  | month=12 year=1963  | month=1 year=1966   | month=1 year=1969   | month=12 year=1972  |
| month=12 year=1981  | month=2 year=1964   | month=2 year=1966   | month=2 year=1969   | month=2 year=1973   |
| month=1 year=1996   | month=2 year=1965   | month=2 year=1968   | month=12 year=1972  | month=12 year=1982  |
| month=12 year=2002  | month=1 year=1966   | month=12 year=1968  | month=1 year=1973   | month=1 year=1983   |
| month=2 year=2005   | month=2 year=1966   | month=12 year=1970  | month=2 year=1973   | month=2 year=1983   |
| month=12 year=2009  | month=2 year=1968   | month=1 year=1971   | month=12 year=1982  | month=12 year=1986  |
| month=1 year=2010   | month=12 year=1968  | month=12 year=1976  | month=1 year=1983   | month=1 year=1987   |
| month=2 year=2010   | month=2 year=1969   | month=2 year=1978   | month=2 year=1983   | month=2 year=1987   |
| month=12 year=2010  | month=1 year=1970   | month=12 year=1978  | month=12 year=1986  | month=12 year=1987  |
|                     | month=12 year=1970  | month=1 year=1979   | month=1 year=1987   | month=12 year=1991  |
|                     | month=1 year=1971   | month=1 year=1985   | month=2 year=1987   | month=1 year=1992   |
|                     | month=12 year=1976  | month=1 year=1987   | month=12 year=1987  | month=2 year=1992   |
|                     | month=2 year=1978   | month=12 year=1989  | month=12 year=1991  | month=12 year=1994  |
|                     | month=12 year=1978  | month=12 year=1995  | month=1 year=1992   | month=12 year=1997  |
|                     | month=1 year=1979   | month=12 year=1996  | month=2 year=1992   | month=1 year=1998   |
|                     | month=1 year=1985   |                     | month=12 year=1994  | month=2 year=1998   |
|                     | month=1 year=1987   |                     | month=12 year=1997  | month=12 year=2006  |
|                     | month=12 year=1989  |                     | month=1 year=1998   | month=12 year=2015  |
|                     | month=12 year=1995  |                     | month=2 year=1998   | month=1 year=2016   |
|                     | month=12 year=1996  |                     | month=12 year=2002  | month=2 year=2016   |
|                     | month=12 year=2009  |                     | month=12 year=2006  |                     |
|                     | month=1 year=2010   |                     | month=12 year=2009  |                     |
|                     | month=2 year=2010   |                     | month=1 year=2010   |                     |
|                     | month=12 year=2010  |                     | month=2 year=2010   |                     |
|                     |                     |                     | month=12 year=2015  |                     |
|                     |                     |                     | month=1 year=2016   |                     |
|                     |                     |                     | month=2 year=2016   |                     |

Table S1

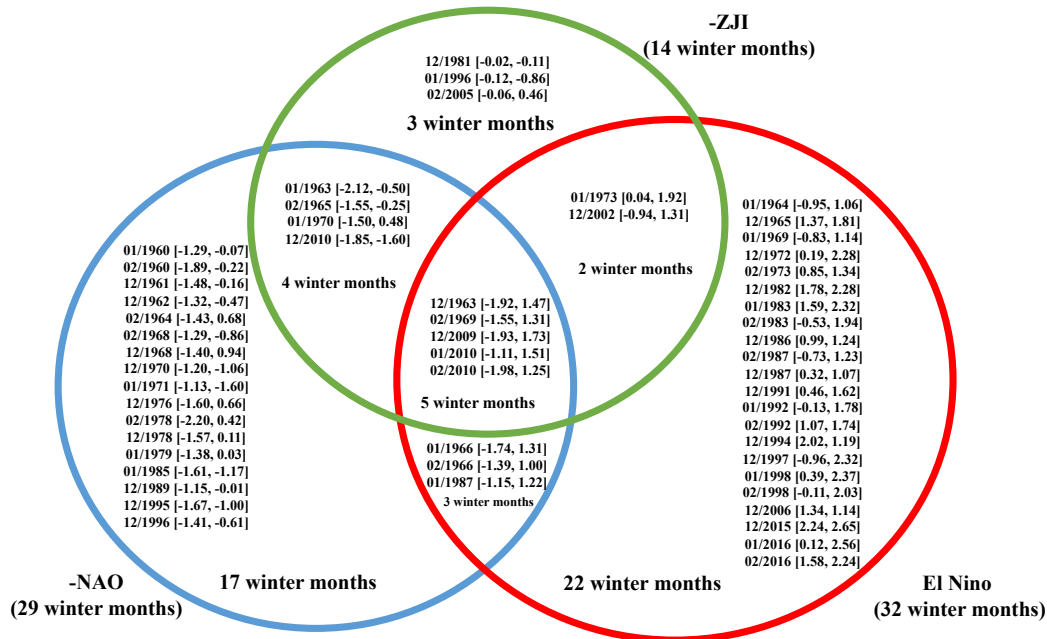

Table S2: Venn diagram of winter groups in Table S1. The winter months are mentioned as: month/year [NAO index, Oceanic Niño Index]

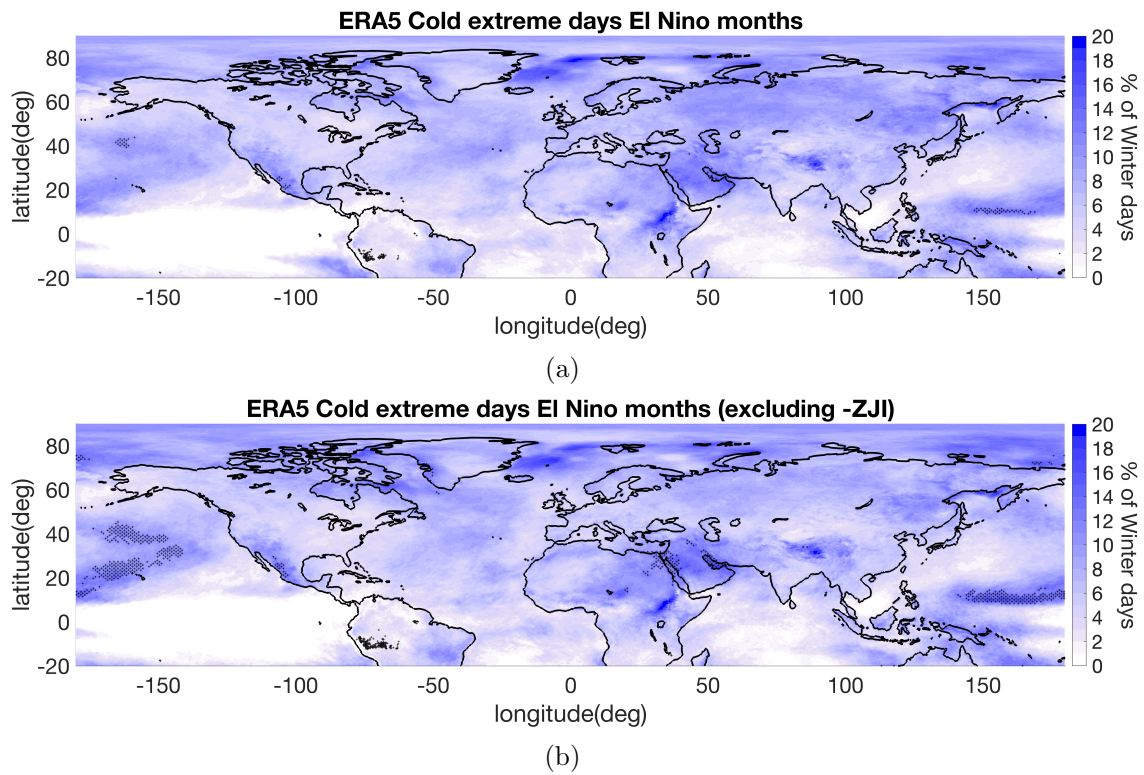

Figure S1: The distribution of the percentage of cold extreme days for (a) El Nino winter months (b)El Nino winter months excluding merged jet months. The regions marked in (\*) represent regions significant at 99% using Monte Carlo simulation.

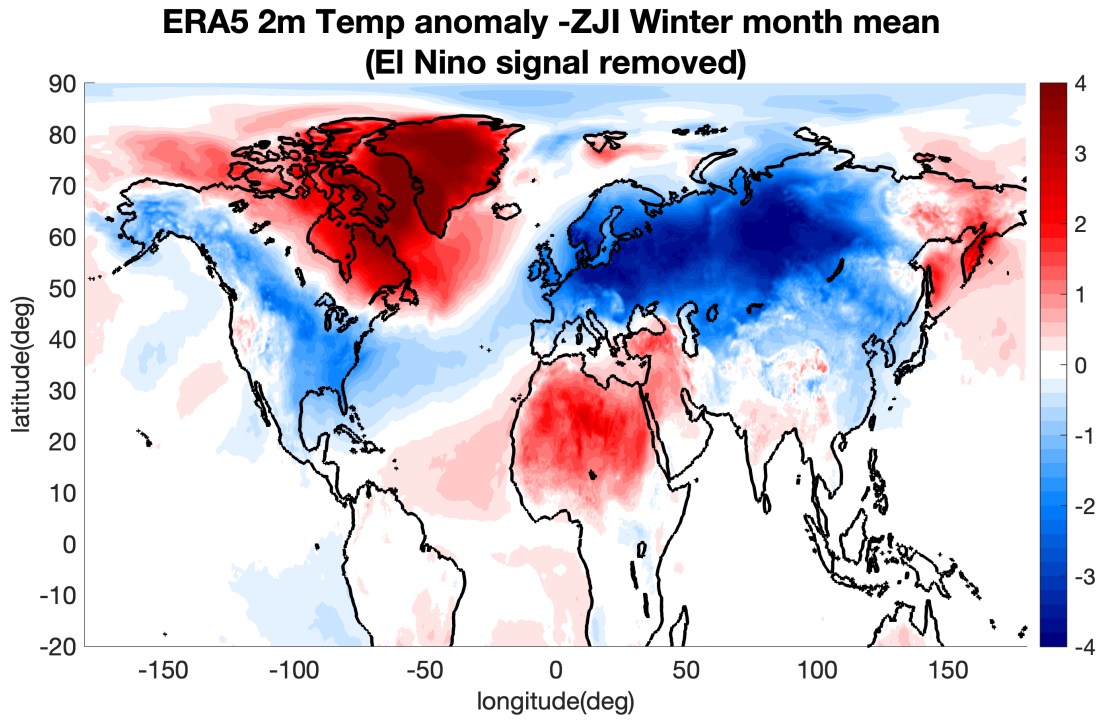

(a)

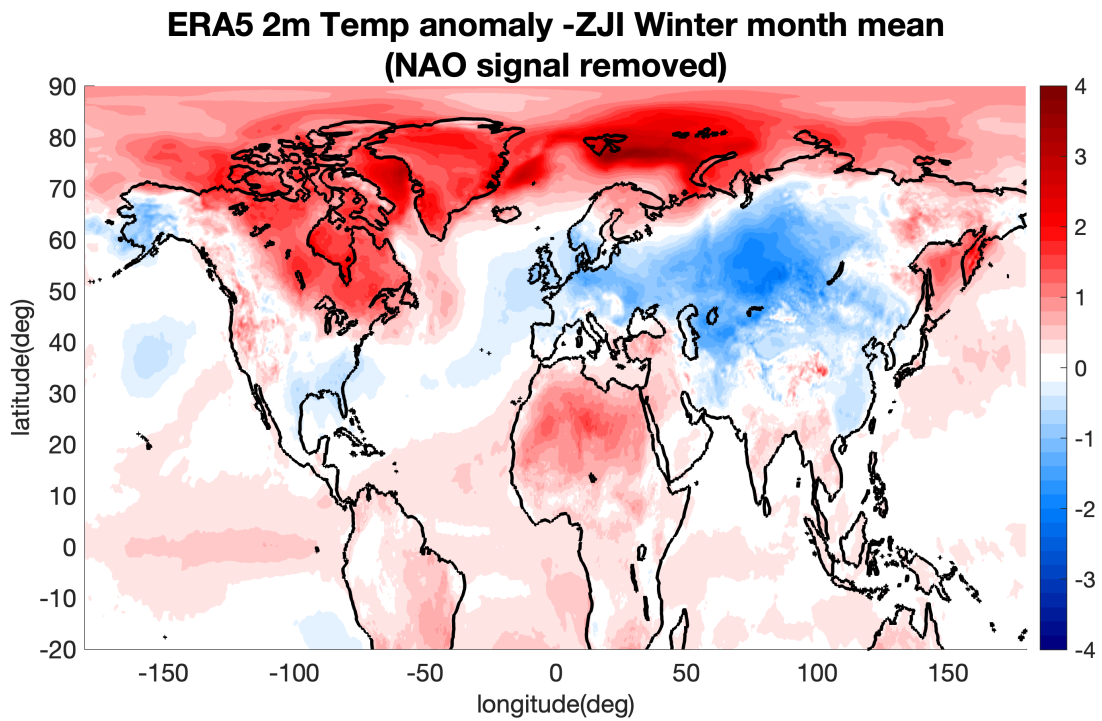

(b)

Figure S2: Composite for anomalous detrended 2m surface temperature (K) composite for -ZJI winter months after regressing out (a) El Nino signals (b) NAO signals

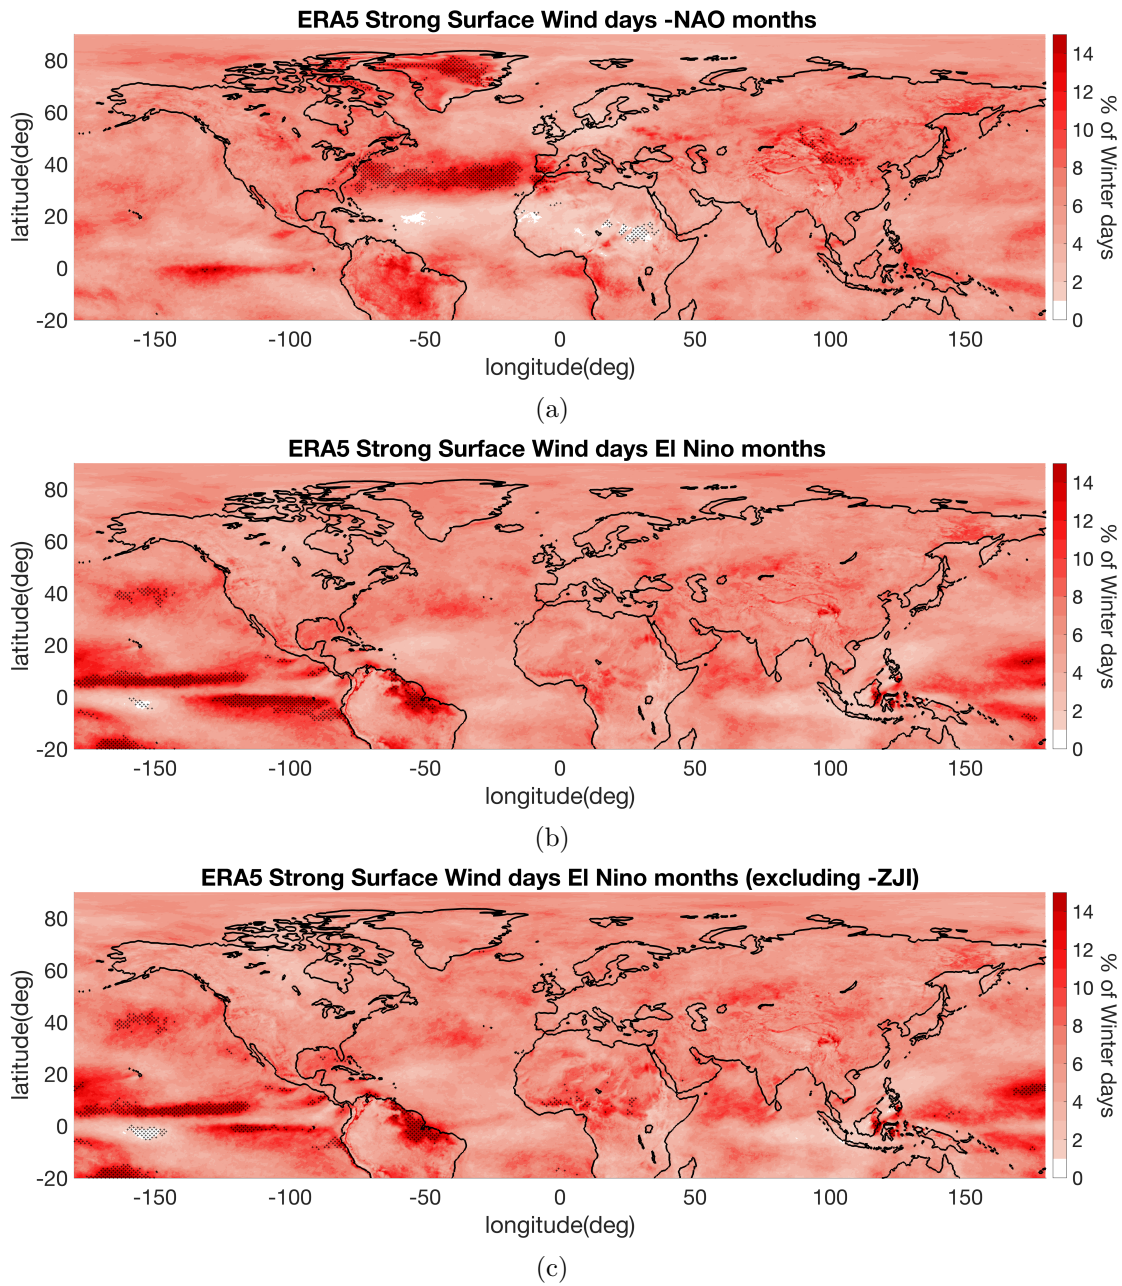

Figure S3: The distribution of the percentage of strong surface wind days for (a) negative NAO winter months (b) El Niño winter months (c) El Niño winter months excluding merged jet months. The regions marked in (\*) represent regions significant at 99% using Monte Carlo simulation.

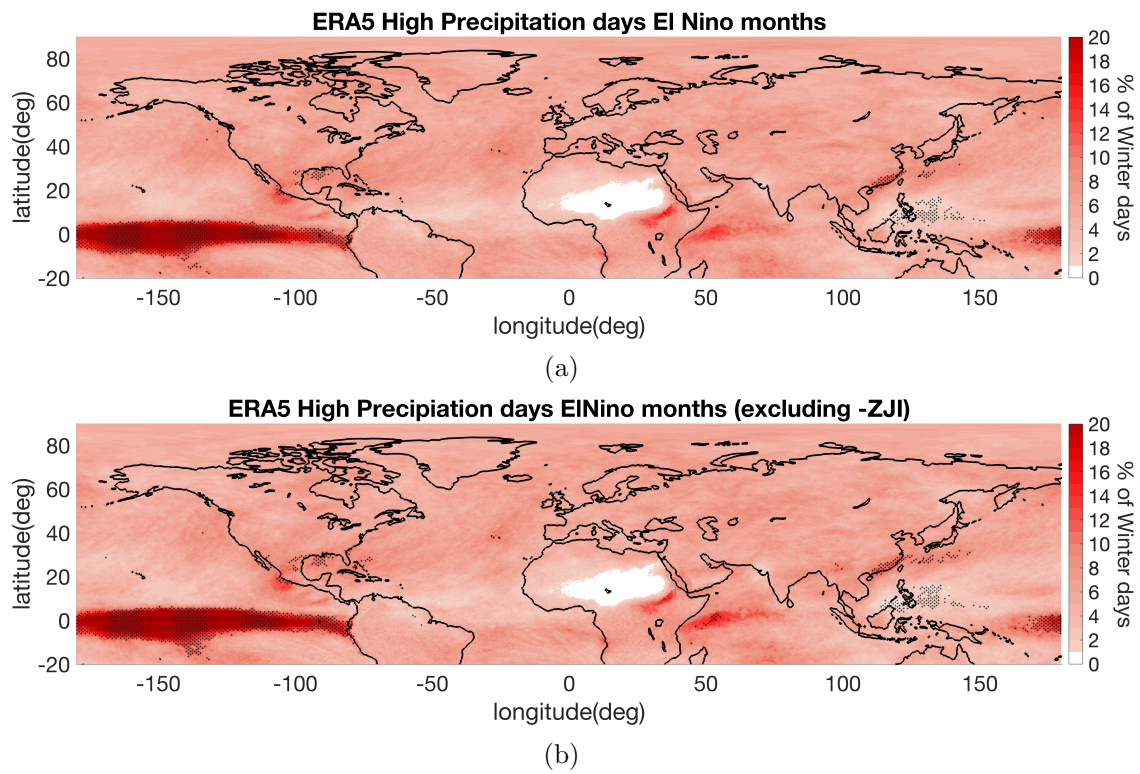

Figure S4: The distribution of the percentage of high precipitation days for (a) El Niño winter months (b) El Niño winter months excluding merged jet months. The regions marked in (\*) represent regions significant at 99% using Monte Carlo simulation.
